# Supplementary material for: Immunogenic Amino Acid Motifs and Linear Epitopes of COVID-19 mRNA Vaccines
Source: bioRxiv or medRxiv preprint supplement (doi:10.1101/2021.05.25.21257427), 2021-05-25
Supplement: Supplementary file [file media-1.pdf]

## Immunogenic Amino Acid Motifs and Linear Epitopes of COVID-19 mRNA Vaccines

Adam V Wisnewski<sup>1\*</sup>, Carrie A Redlich<sup>1</sup>, Kathy Kamath<sup>2</sup>, Queenie-Ann Abad<sup>1</sup>, Richard F Smith<sup>1</sup>, Louis Fazen<sup>1</sup>, Romero Santiago<sup>1</sup>, Jian Liu<sup>1</sup>, Julian Campillo Luna<sup>1</sup>, Brian Martinez<sup>2</sup>, Elizabeth Baum-Jones<sup>2</sup>, Rebecca Waitz<sup>2</sup>, Winston A Haynes<sup>2</sup>, John C Shon<sup>2</sup>

<sup>1</sup>Department of Medicine, Yale University School of Medicine, New Haven, CT 06520

<sup>2</sup>Serimmune, Inc., Goleta, CA, 93117, USA

\*Corresponding Author: Adam Wisnewski, PO Box 208057, Yale University School of Medicine, New Haven, CT 06520, email: [adam.wisnewski@yale.edu](mailto:adam.wisnewski@yale.edu), phone: (203) 737-4054, fax: (203) 785-3826

| Table of Contents                                                                                                     | Page |
|-----------------------------------------------------------------------------------------------------------------------|------|
| Table S1. Table of study subjects                                                                                     | 2    |
| Table S2. Table of fold enrichment in amino acid motifs                                                               | 4    |
| Figure S1. Correlation of enrichment for IgG with specificity for overlapping amino acid motifs                       | 5    |
| Figure S2. Correlation of enrichment for IgG with specificity for non-overlapping amino acid motifs and age           | 6    |
| Correlation Matrix 1. Heat map of correlation between recognition of different amino acid motifs                      | 7    |
| Figure S3. Correlation of PIWAS score for LE-1 vs. enrichment for amino acid motif [FY]XX[QE]LXXWF                    | 8    |
| Figure S4. Linear epitope mapping of individual subject's IgG, after COVID/pre-vaccine vs. after COVID/post vaccine   | 9    |
| List S1. Peptides with strongest identity to SARS-CoV-2 spike mRNA vaccine epitopes identified though BLAST® analysis | 10   |
| Table S3. PIWAS values for all subjects.                                                                              | 11   |

Immunogenic Amino Acid Motifs and Linear Epitopes of COVID-19 mRNA Vaccines: Supplemental Materials

Table S1. Table of Study Subjects

| Subject # | Sex    | Age Range | COVID Vaccination | Vaccine Manufacturer | COVID Vaccination Initial | COVID Vaccination Booster | Timepoint        | SARS-CoV-2 PCR Status | SARS-CoV-2 IgG Status | Spike IgG ELISA OD |
|-----------|--------|-----------|-------------------|----------------------|---------------------------|---------------------------|------------------|-----------------------|-----------------------|--------------------|
| 1         | Male   | 35-40     |                   |                      |                           |                           | pre-vaccine      | N/A                   | Negative              | not detected       |
| 2         | Female | 30-35     |                   |                      |                           |                           | pre-vaccine      | N/A                   | Negative              | not detected       |
| 3         | Female | 46-50     |                   |                      |                           |                           | pre-vaccine      | N/A                   | Negative              | not detected       |
| 4         | Male   | 25-30     |                   |                      |                           |                           | pre-vaccine      | N/A                   | Negative              | not detected       |
| 5         | Female | 46-50     |                   |                      |                           |                           | pre-vaccine      | N/A                   | Negative              | not detected       |
| 6         | Female | 40-45     |                   |                      |                           |                           | pre-vaccine      | N/A                   | Negative              | not detected       |
| 7         | Female | 56-60     |                   |                      |                           |                           | pre-vaccine      | N/A                   | Negative              | not detected       |
| 8         | Male   | 35-40     |                   |                      |                           |                           | pre-vaccine      | N/A                   | Negative              | not detected       |
| 9         | Female | 35-40     |                   |                      |                           |                           | pre-vaccine      | N/A                   | Negative              | not detected       |
| 10        | Female | 40-45     |                   |                      |                           |                           | pre-vaccine      | N/A                   | Negative              | not detected       |
| 11        | Male   | 30-35     |                   |                      |                           |                           | pre-vaccine      | N/A                   | Negative              | not detected       |
| 12        | Female | 26-30     |                   |                      |                           |                           | pre-vaccine      | N/A                   | Negative              | not detected       |
| 13        | Female | 26-30     |                   |                      |                           |                           | pre-vaccine      | N/A                   | Negative              | not detected       |
| 14        | Female | 30-35     |                   |                      |                           |                           | pre-vaccine      | N/A                   | Negative              | not detected       |
| 15        | Female | 26-30     |                   |                      |                           |                           | pre-vaccine      | N/A                   | Negative              | not detected       |
| 16        | Female | 30-35     |                   |                      |                           |                           | pre-vaccine      | N/A                   | Negative              | not detected       |
| 17        | Female | 26-30     |                   |                      |                           |                           | pre-vaccine      | N/A                   | Negative              | not detected       |
| 18        | Male   | 26-30     |                   |                      |                           |                           | pre-vaccine      | N/A                   | Negative              | not detected       |
| 19        | Male   | 56-60     |                   |                      |                           |                           | pre-vaccine      | N/A                   | Negative              | not detected       |
| 20        | Female | 26-30     |                   |                      |                           |                           | pre-vaccine      | N/A                   | Negative              | not detected       |
| 1         | Male   | 35-40     | yes               | Pfizer               | yes                       | yes                       | D36 Post Vaccine | N/A                   | Positive              | 1.6                |
| 2         | Female | 30-35     | yes               | Pfizer               | yes                       | yes                       | D36 Post Vaccine | N/A                   | Positive              | 1.7                |
| 3         | Female | 46-50     | yes               | Pfizer               | yes                       | yes                       | D36 Post Vaccine | N/A                   | Positive              | 2.0                |
| 4         | Male   | 25-30     | yes               | Pfizer               | yes                       | yes                       | D36 Post Vaccine | N/A                   | Positive              | 2.5                |
| 5         | Female | 46-50     | yes               | Pfizer               | yes                       | yes                       | D36 Post Vaccine | N/A                   | Positive              | 2.4                |
| 6         | Female | 40-45     | yes               | Pfizer               | yes                       | yes                       | D36 Post Vaccine | N/A                   | Positive              | 1.3                |
| 7         | Female | 56-60     | yes               | Pfizer               | yes                       | yes                       | D36 Post Vaccine | N/A                   | Positive              | 1.4                |
| 8         | Male   | 35-40     | yes               | Pfizer               | yes                       | yes                       | D35 Post Vaccine | N/A                   | Positive              | 1.0                |
| 9         | Female | 35-40     | yes               | Pfizer               | yes                       | yes                       | D34 Post Vaccine | N/A                   | Positive              | 2.0                |
| 10        | Female | 40-45     | yes               | Pfizer               | yes                       | yes                       | D34 Post Vaccine | N/A                   | Positive              | 1.9                |
| 11        | Male   | 30-35     | yes               | Pfizer               | yes                       | yes                       | D34 Post Vaccine | N/A                   | Positive              | 1.8                |
| 12        | Female | 26-30     | yes               | Pfizer               | yes                       | yes                       | D34 Post Vaccine | N/A                   | Positive              | 1.3                |
| 13        | Female | 26-30     | yes               | Pfizer               | yes                       | yes                       | D34 Post Vaccine | N/A                   | Positive              | 1.8                |
| 14        | Female | 30-35     | yes               | Pfizer               | yes                       | yes                       | D34 Post Vaccine | N/A                   | Positive              | 2.0                |
| 15        | Female | 26-30     | yes               | Pfizer               | yes                       | yes                       | D34 Post Vaccine | N/A                   | Positive              | 2.4                |
| 16        | Female | 30-35     | yes               | Pfizer               | yes                       | yes                       | D33 Post Vaccine | N/A                   | Positive              | 2.0                |
| 17        | Female | 26-30     | yes               | Pfizer               | yes                       | yes                       | D33 Post Vaccine | N/A                   | Positive              | 1.8                |
| 18        | Male   | 26-30     | yes               | Pfizer               | yes                       | yes                       | D31 Post Vaccine | N/A                   | Positive              | 3.0                |
| 19        | Male   | 56-60     | yes               | Pfizer               | yes                       | yes                       | D30 Post Vaccine | N/A                   | Positive              | 0.9                |
| 20        | Female | 26-30     | yes               | Pfizer               | yes                       | yes                       | D30 Post Vaccine | N/A                   | Positive              | 2.1                |
| 21        | Male   | 50-55     | yes               | Moderna              | yes                       | yes                       | D36 Post Vaccine | N/A                   | Positive              | 2.2                |
| 22        | Female | 56-60     | yes               | Moderna              | yes                       | yes                       | D38 Post Vaccine | N/A                   | Positive              | 2.0                |
| 23        | Male   | 30-35     | yes               | Moderna              | yes                       | yes                       | D35 Post Vaccine | N/A                   | Positive              | 2.5                |

Immunogenic Amino Acid Motifs and Linear Epitopes of COVID-19 mRNA Vaccines: Supplemental Materials

|           |        |        |     |         |     |     |                  |          |          |      |
|-----------|--------|--------|-----|---------|-----|-----|------------------|----------|----------|------|
| <b>24</b> | Male   | 20-25  | yes | Moderna | yes | yes | D35 Post Vaccine | N/A      | Positive | 2.4  |
| <b>25</b> | Female | 95-100 | yes | Moderna | yes | yes | D35 Post Vaccine | N/A      | Positive | 2.7  |
| <b>26</b> | Female | 50-55  | yes | Moderna | yes | yes | D35 Post Vaccine | N/A      | Positive | 1.9  |
| <b>27</b> | Female | 20-25  | yes | Moderna | yes | yes | D35 Post Vaccine | N/A      | Positive | 2.4  |
| <b>28</b> | Male   | 26-30  | yes | Moderna | yes | yes | D35 Post Vaccine | Negative | Positive | 2.5  |
| <b>29</b> | Female | 40-45  | yes | Moderna | yes |     | D13-Post vaccine | positive | Positive | 1.8  |
| <b>30</b> | Female | 40-45  | yes | Pfizer  | yes |     | D11-Post Vaccine | positive | Positive | >3.5 |
| <b>31</b> | Male   | 46-50  | yes | Moderna | yes |     | D10-Post vaccine | positive | Positive | >3.5 |
| <b>32</b> | Male   | 30-35  | yes | Moderna | yes |     | D14-Post Vaccine | positive | Positive | >3.5 |
| <b>33</b> | Female | 60-65  | yes | Pfizer  | yes |     | D17-Post Vaccine | positive | Positive | >3.5 |
| <b>32</b> | Male   | 30-35  | no  |         |     |     | pre-vaccine      | positive | Positive | 1.6  |
| <b>33</b> | Female | 60-65  | no  |         |     |     | pre-vaccine      | positive | Positive | 1.1  |

Table 2. Fold Enrichment in Amino Acid Motif Recognition by Different Subjects

| Subject ID # | [ACP]XXXDXSGI | DXSGIXXX[DGESN] | FXXELXX[WY]F | KWXXFQQ  | [FY]XX[QE]LXXWF | P[EDT]WRXY | RXPX[ST]L[DE] | K[FY][LM]XFXQ | PXWR[IV]Y | [AC]K[FY]XXFXQ |
|--------------|---------------|-----------------|--------------|----------|-----------------|------------|---------------|---------------|-----------|----------------|
| 1            | 24.12188      | 28.89815        | 14.16188     | 2.90406  | 10.03086        | 1.63869    | 1.8324        | 2.86602       | 0.97399   | 1.14955        |
| 2            | 1.3568        | 2.80499         | 0.79658      | 8.14162  | 0.91802         | 2.94699    | 1.60712       | 4.3079        | 2.53118   | 2.10418        |
| 3            | 45.54796      | 42.14705        | 7.65677      | 15.33523 | 4.19016         | 10.15588   | 11.67805      | 6.29133       | 9.65864   | 4.88007        |
| 4            | 74.64611      | 52.41181        | 35.46319     | 23.11651 | 17.59506        | 3.7325     | 12.62332      | 9.11356       | 2.20935   | 6.17086        |
| 5            | 86.52744      | 75.57166        | 35.07616     | 7.11044  | 4.17209         | 2.62366    | 0.83056       | 2.41959       | 2.41142   | 1.62939        |
| 6            | 9.08279       | 9.20852         | 20.26051     | 4.23238  | 3.19377         | 4.01896    | 7.89146       | 2.39675       | 3.20445   | 3.09941        |
| 7            | 11.775        | 9.4349          | 0.34627      | 2.19791  | 0.53115         | 1.09487    | 1.67598       | 1.86742       | 1.91283   | 0.83012        |
| 8            | 12.75622      | 16.91751        | 26.06295     | 0.85512  | 10.78932        | 0.87751    | 1.168         | 1.58294       | 0.42967   | 1.7407         |
| 9            | 16.87036      | 18.89413        | 22.21202     | 31.01272 | 1.58234         | 22.15339   | 4.71435       | 14.63689      | 18.01009  | 9.6201         |
| 10           | 7.991         | 7.36731         | 24.80848     | 9.95705  | 23.19741        | 6.76044    | 7.69714       | 2.83034       | 4.01064   | 2.25895        |
| 11           | 8.81782       | 8.24756         | 6.1367       | 3.31935  | 1.65641         | 7.76581    | 5.46426       | 2.23179       | 5.67561   | 1.65069        |
| 12           | 33.42265      | 30.07481        | 17.76317     | 18.24522 | 7.05165         | 4.54149    | 3.89708       | 6.58812       | 4.62662   | 4.24812        |
| 13           | 21.65294      | 21.84343        | 58.46848     | 19.18538 | 26.32006        | 9.91419    | 20.31965      | 5.5046        | 5.86914   | 3.792          |
| 14           | 56.01096      | 48.77159        | 47.76832     | 9.07255  | 23.93239        | 11.28625   | 20.43179      | 3.24127       | 5.76119   | 2.20879        |
| 15           | 27.55929      | 28.09445        | 27.27589     | 28.66981 | 5.85507         | 23.93945   | 13.42879      | 11.62889      | 16.50785  | 7.58091        |
| 16           | 69.39203      | 72.35511        | 40.49051     | 82.80327 | 6.35543         | 5.81869    | 10.75896      | 31.03799      | 3.28103   | 25.63274       |
| 17           | 3.64422       | 4.90357         | 10.3055      | 2.92826  | 1.50749         | 2.41707    | 6.58392       | 2.84551       | 1.50774   | 1.42116        |
| 18           | 39.47938      | 30.3566         | 20.42899     | 22.36679 | 10.4027         | 11.71427   | 2.73141       | 7.92746       | 13.83002  | 5.05539        |
| 19           | 2.27761       | 3.50932         | 8.46049      | 2.84196  | 4.86742         | 1.2403     | 1.71339       | 1.13049       | 2.1335    | 1.25074        |
| 20           | 11.09478      | 10.25416        | 42.05175     | 28.66604 | 13.59703        | 34.38442   | 1.30943       | 5.73332       | 20.88919  | 3.42484        |
| 21           | 0.66991       | 1.17311         | 6.45055      | 2.99584  | 2.0799          | 0.64202    | 0.87316       | 1.43845       | 0.73027   | 1.2127         |
| 22           | 0.78098       | 0.56674         | 1.44845      | 2.59875  | 1.38039         | 3.30676    | 2.21652       | 1.26755       | 2.51584   | 1.28278        |
| 23           | 8.76277       | 9.59592         | 28.73647     | 10.94687 | 4.11469         | 2.28089    | 4.93592       | 5.0789        | 1.31525   | 2.97093        |
| 24           | 14.24855      | 16.75375        | 5.25025      | 45.38644 | 2.94386         | 23.11886   | 12.23777      | 21.57018      | 17.69763  | 15.08657       |
| 25           | 28.48567      | 27.45478        | 21.08092     | 20.42211 | 2.53462         | 16.57896   | 4.38707       | 9.4571        | 13.02877  | 5.76048        |
| 26           | 1.45674       | 1.00078         | 7.97533      | 3.71951  | 1.18545         | 2.23491    | 5.45684       | 1.57078       | 1.08261   | 1.1916         |
| 27           | 6.6744        | 7.92231         | 12.1883      | 6.86614  | 7.14451         | 6.0221     | 1.8916        | 4.05087       | 5.06876   | 2.38904        |
| 28           | 33.77127      | 36.42345        | 43.57688     | 17.74377 | 5.07247         | 10.1257    | 4.87788       | 5.65815       | 9.38512   | 4.34097        |
| 29           | 118.4104      | 96.1604         | 61.08806     | 41.86992 | 29.68794        | 26.41247   | 2.33624       | 21.91133      | 71.63942  | 13.09448       |
| 30           | 0.744         | 0.74156         | 77.70677     | 1.32981  | 41.33262        | 21.34096   | 4.75237       | 0.91951       | 8.95235   | 0.61937        |
| 31           | 3.77329       | 2.69862         | 57.97974     | 32.51077 | 40.72458        | 54.41257   | 29.78026      | 17.23821      | 44.7197   | 11.13788       |
| 32           | 11.83184      | 15.71697        | 55.50956     | 41.74956 | 29.17609        | 25.97491   | 2.97936       | 19.4578       | 14.60386  | 13.26798       |
| 33           | 1.95214       | 0.56701         | 46.74683     | 3.37901  | 30.57662        | 0.96797    | 3.16383       | 4.33146       | 0.79088   | 3.41584        |

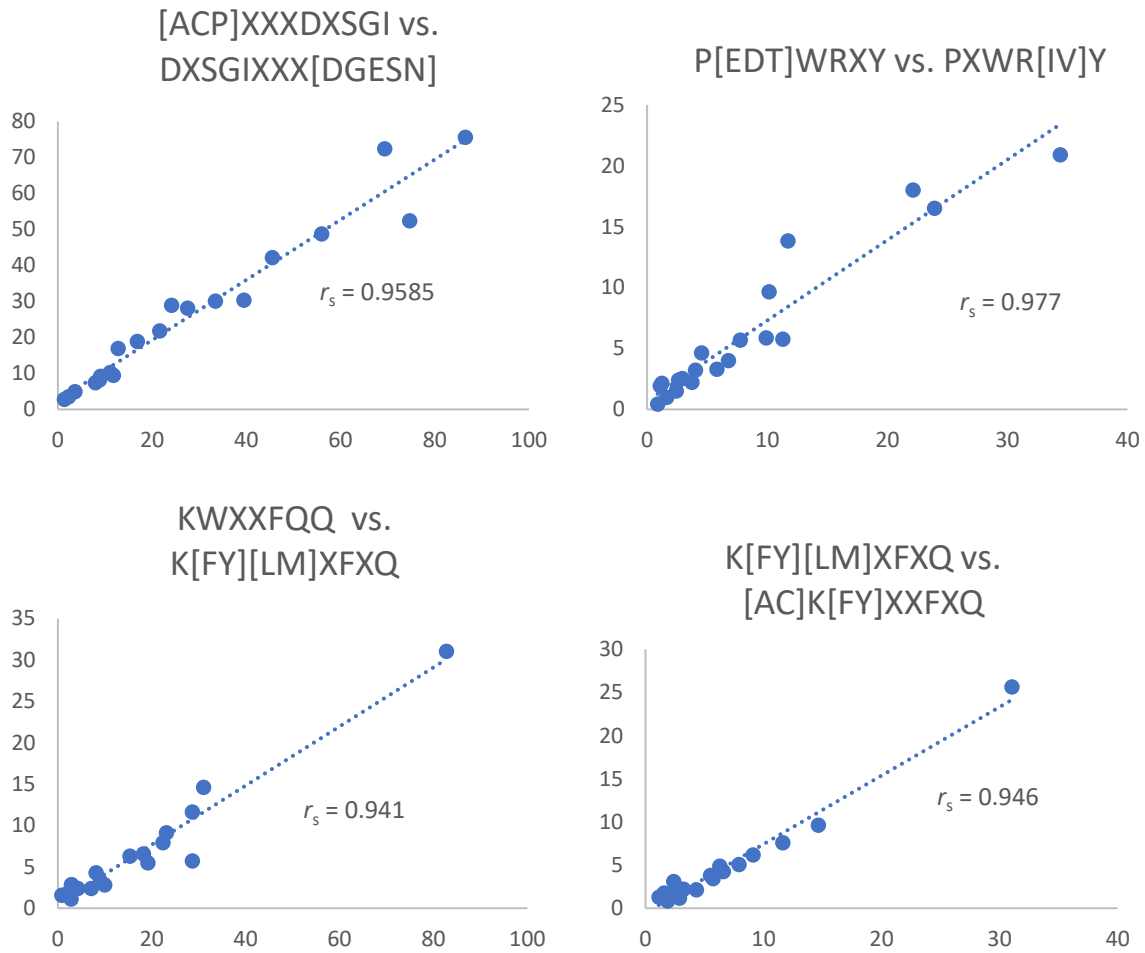

Figure S1. Correlation of IgG recognition of peptide motifs with overlapping amino acids. The fold enrichment in IgG with specificity for the different pairs of amino acid motifs (respective x and Y-axis) are shown along with the Spearman rank correlation ( $r_s$ ) value. Each symbol represents a different COVID-19 mRNA vaccine recipient. Trend lines were fitted by linear regression. Spearman rank correlation ( $r_s$ ) is displayed.

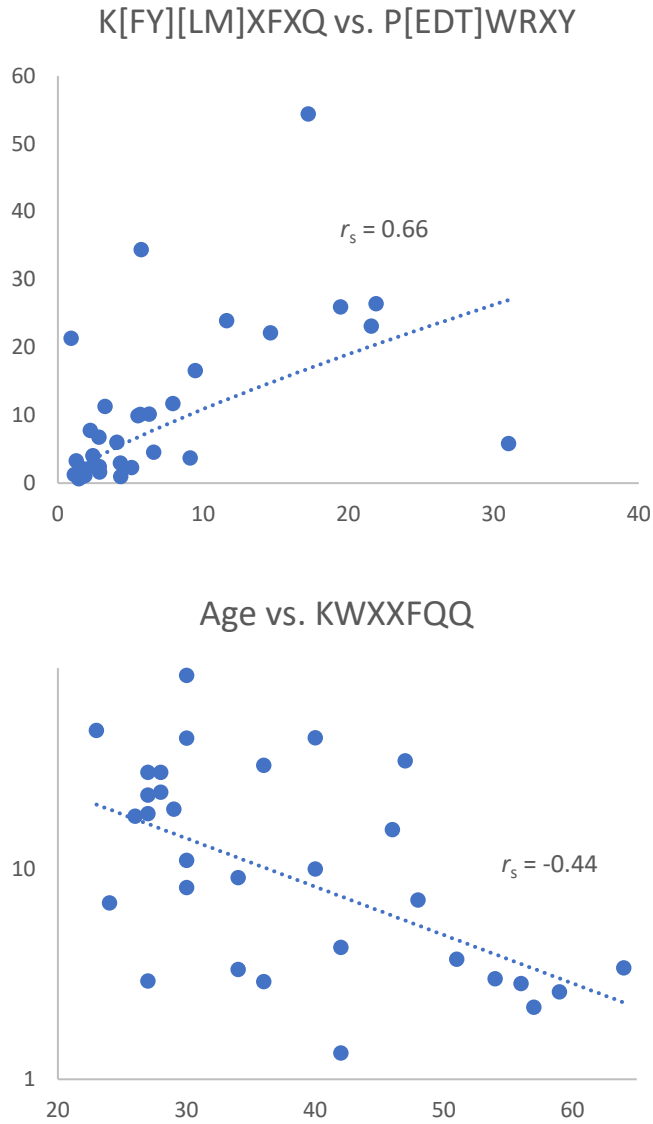

Figure S2. Correlation of amino acid motif recognition and age of vaccinated subjects. Panel A: The fold enrichment in IgG with specificity for the amino acid motifs K[FY][LM]XFXQ vs. P[EDT]WRXY is shown. Each symbol corresponds to a different vaccinated individual. Panel B: The fold enrichment in IgG with specificity for the amino acid motif KWXXFQQ (Y-axis) is plotted against age (X-axis). Trend lines were fitted by linear regression. Spearman rank correlation ( $r_s$ ) is displayed.

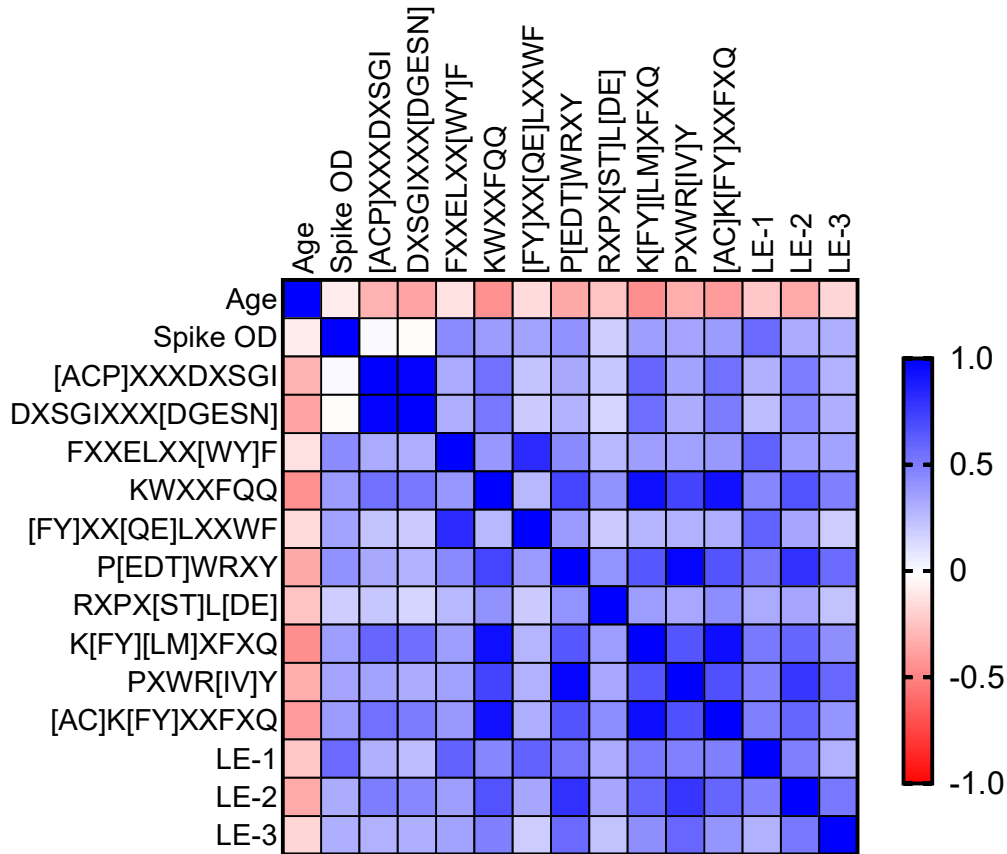

Correlation Matrix 1. The correlation between enrichment in IgG recognition of amino acid motifs and linear epitopes. Spearman rank correlation values are displayed as a heat map by color according to key on right for different epitopes recognized by IgG from COVID-19 mRNA vaccine recipients.

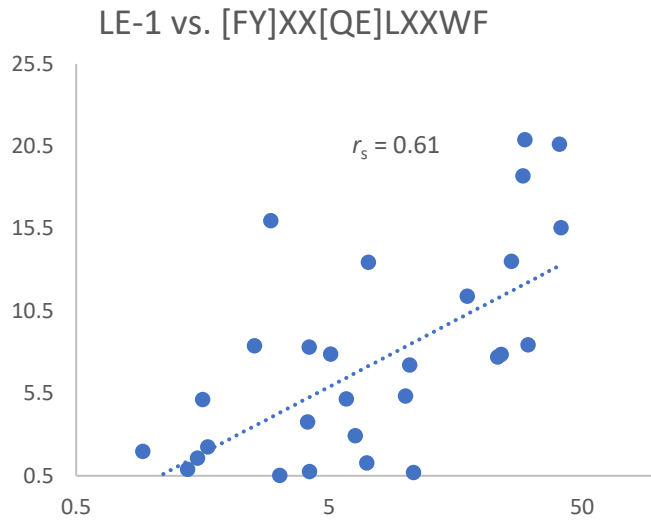

Figure S3. Correlation between IgG recognition of amino acid motif [FY]XX[QE]LXXWF and linear epitope LE-1. The PIWAS score (Y-axis) for IgG recognition of LE-1 for individual subjects was plotted vs. the fold enrichment in IgG (X-axis) with specificity for the amino acid motif [FY]XX[QE]LXXWF in subjects that received mRNA vaccine. Each symbol corresponds to a different vaccinated individual. Trend lines were fitted by linear regression. Spearman rank correlation ( $r_s$ ) is displayed.



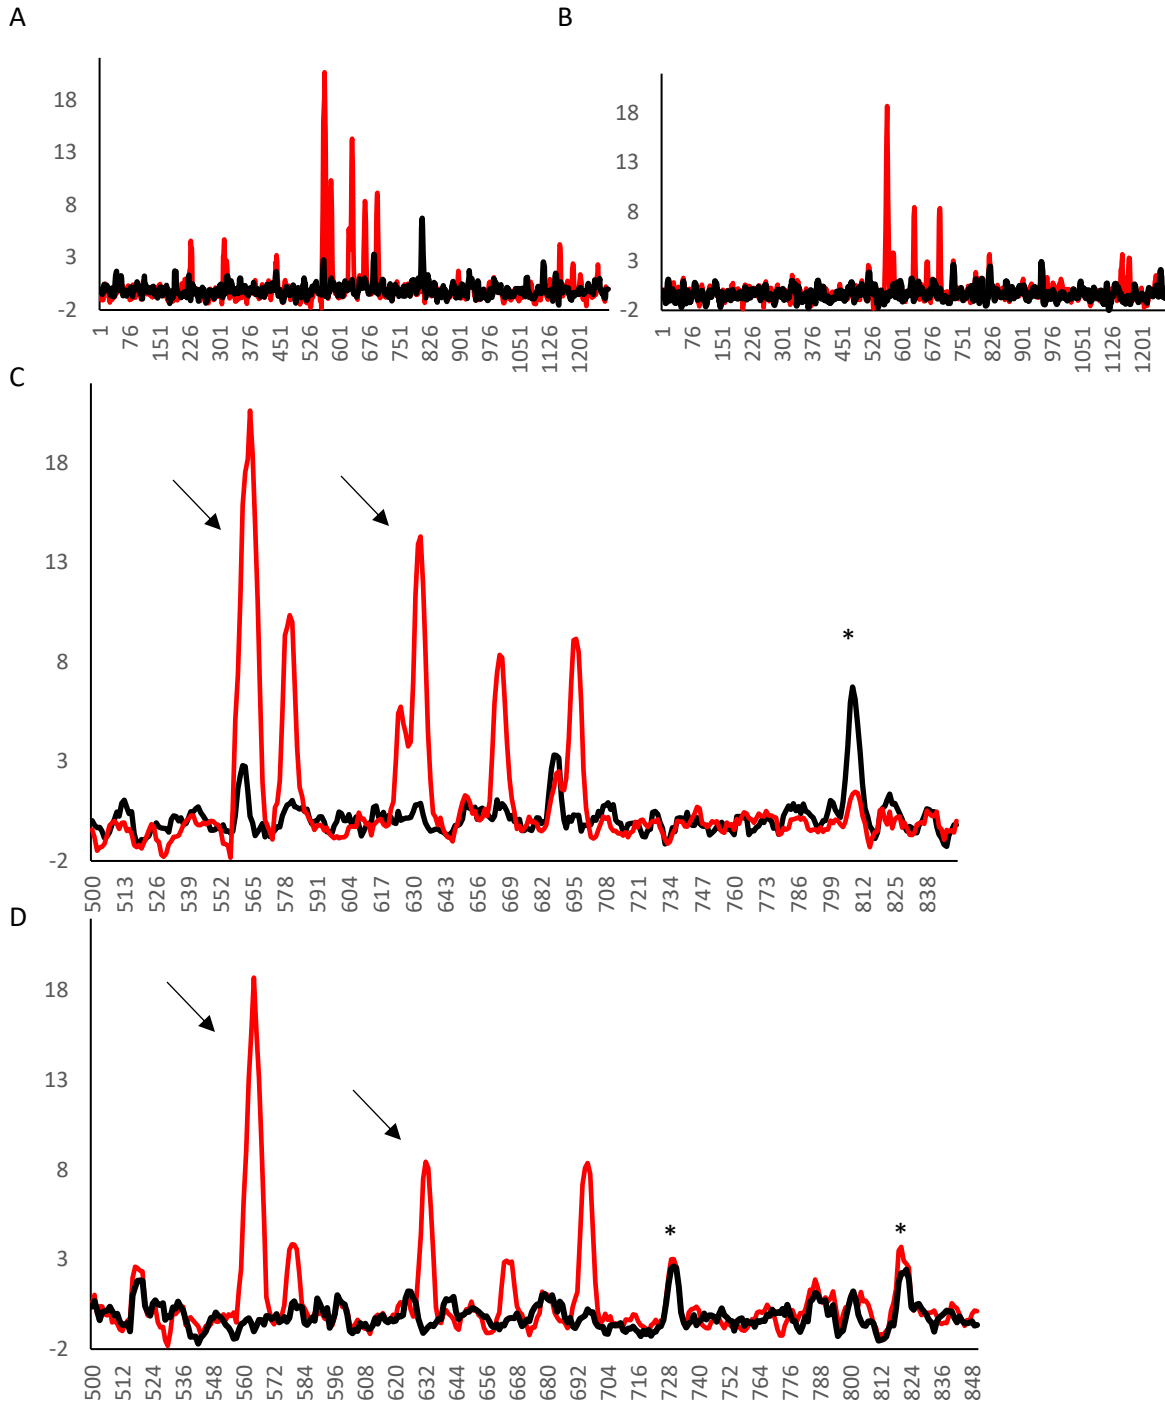

Figure S4. Examples of epitopes that drive IgG responses in mRNA vaccinated subjects with prior COVID-19. The PIWAS scores (Y-axis) are graphed for peptides surrounding different amino acids along the SARS-CoV-2 spike protein (X-axis) that are recognized by IgG after COVID-19/pre-vaccine (black) and after COVID-19 and vaccination (red). Panels A (subject 32) and B (subject 33) show entire spike protein and Panels C and D respectively focus on the region surrounding the S1/S2 junction. Note dominant epitope LE-1 and LE-2 (→) in both subjects and lack of substantial boost to highlighted naturally occurring epitopes (\*)

List S1. Peptides with strongest identity to SARS-CoV-2 spike mRNA vaccine epitopes identified through BLAST® analysis (<https://blast.ncbi.nlm.nih.gov/Blast.cgi?PAGE=Proteins>)

**1) LE-1 Epitope: FLPFQQFGRDIA**

>translation elongation factor Ts [Candidatus Omnitrophica bacterium]

Sequence ID: MBI1977219.1 Length: 198

Query 4 FQQFGRDIA 12

FQQFGRDIA

Sbjct 92 FQQFGRDIA 100

**2) LE-2 Epitope: DQLTPTWRVY**

>hypothetical protein [Thermoplasmata archaeon]

Query 1 DQLTPTWRV 9

DQLTPTWRV

Sbjct 39 DQLTPTWRV 47

**3) LE-3 Epitope: FKEELDKYFKN**

>MULTISPECIES: universal stress protein [Aquimarina]

Sequence ID: WP\_074407094.1 Length: 283

Query 2 KEELDKYFKN 11

KEELDKYFKN

Sbjct 205 KEELDKYFKN 214

Table with columns for subject ID, amino acid position, and three different vaccine samples (Pre-vaccine samples from N=20 subjects, Post-vaccine samples from N=20 subjects, and Post-vaccine samples from N=5 prior COVID-19 post vaccination Moderna recipients). The table contains a dense grid of amino acid symbols (A, C, D, E, F, G, H, I, K, L, M, N, P, Q, R, S, T, V, W, Y) and dashes representing missing data.



Table with 10 columns of numerical data, likely representing amino acid sequences or epitope coordinates. The table is split into two main sections, each containing 1000 rows of data.

Table with 1000 rows and 1000 columns of numerical data. Each row contains a sequence of 1000 values, likely representing a specific data series or model output. The values are small, ranging from approximately -0.0001 to 0.0001.

Table with 10 columns: Index, Amino Acid, Methyl Epitope, Linear Epitope, and Index. The table lists various amino acids and their corresponding methyl and linear epitopes, with indices ranging from 664 to 9068.

Table with 100 columns and 1000 rows of numerical data. Each row contains 100 numerical values, likely representing data points for different variables or conditions.

Table with 100 columns and 1000 rows of numerical data. Each row contains 100 numerical values, likely representing data points for different variables or conditions.

Table with 100 columns and 1000 rows of numerical data. Each row contains 100 numerical values, likely representing data points for different variables or conditions.

Table with 100 columns and 1000 rows of numerical data. Each row contains 100 numerical values, likely representing data points for different variables or conditions.



Table with 10 columns: Gene, Allele, Frequency, Gene, Allele, Frequency, Gene, Allele, Frequency, Gene, Allele, Frequency. Contains genetic data for various HLA loci such as HLA-DQA1, HLA-DQB1, HLA-DPA1, HLA-DPB1, HLA-DQA2, HLA-DQB2, HLA-DPA2, HLA-DPB2, HLA-DQA3, HLA-DQB3, HLA-DPA3, HLA-DPB3, HLA-DQA4, HLA-DQB4, HLA-DPA4, HLA-DPB4, HLA-DQA5, HLA-DQB5, HLA-DPA5, HLA-DPB5, HLA-DQA6, HLA-DQB6, HLA-DPA6, HLA-DPB6, HLA-DQA7, HLA-DQB7, HLA-DPA7, HLA-DPB7, HLA-DQA8, HLA-DQB8, HLA-DPA8, HLA-DPB8, HLA-DQA9, HLA-DQB9, HLA-DPA9, HLA-DPB9, HLA-DQA10, HLA-DQB10, HLA-DPA10, HLA-DPB10.

Table with 100 columns and 100 rows of numerical data. The first column contains row indices from 1165 to 1273. The table contains a dense grid of floating-point numbers, likely representing a matrix or a set of data points. The values range from approximately -0.0001 to 0.0001.
